# Supplementary material for: Synergy of mixed chromium species on NiFe layered double hydroxides for promoting alkaline water oxidation
Source: Royal Society of Chemistry journal article supplement (doi:10.1039/d4cy01466a), 2025-01-01
Supplement: d4cy01466a1.pdf [file d4cy01466a1.pdf]

## Support information

### Synergy of mixed chromium species on NiFe layered double hydroxides for promoted alkaline water oxidation

Yongqiang Yang,<sup>a</sup> Jianlei Jing,<sup>a</sup> Zudong Shen,<sup>a</sup> Bo Li,<sup>a</sup> Mengze Ma,<sup>a</sup> Qihao Sha,<sup>a</sup> Wei Liu,<sup>a</sup> Xinlong Guo,<sup>a</sup> Shihang Li,<sup>a</sup> Zhichuan Li,<sup>\*b</sup> Yun Kuang,<sup>\*c</sup> Daojin Zhou<sup>\*a</sup> and Xiaoming Sun<sup>a</sup>

---

a. State Key Laboratory of Chemical Resource Engineering, Beijing University of Chemical Technology, Beijing 100029, China.

b. Cnooc Energy Technology & Service Limited, Clean Energy Branch, Tianjin 300467, China.

c. Ocean Hydrogen Energy R&D Center, Research Institute of Tsinghua University in Shenzhen, Shenzhen 518057, China.

\*E-mail: lizhch6@cnooc.com.cn; kuangy@tsinghua-sz.org; zhoudj@mail.buct.edu.cn

#### Experimental section

##### Synthesis of CO<sub>3</sub><sup>2-</sup>-NiFeCr-LDH:

We prepared CO<sub>3</sub><sup>2-</sup>-NiFeCr-LDH with varying molar ratios of Ni:Fe:Cr, including 6:2:1, 6:1:2, 6:1:1, and 4:1:1. Taking the preparation of CO<sub>3</sub><sup>2-</sup>-NiFeCr(6:2:1)-LDH as an example, 3 mmol of Ni(NO<sub>3</sub>)<sub>2</sub>·6H<sub>2</sub>O, 1 mmol of Fe(NO<sub>3</sub>)<sub>3</sub>·9H<sub>2</sub>O, and 0.5 mmol of Cr(NO<sub>3</sub>)<sub>3</sub>·9H<sub>2</sub>O were dissolved in 20 mL of deionized water to form solution A. Separately, 1 g of NaOH and 1 g of Na<sub>2</sub>CO<sub>3</sub> were dissolved in 40 mL of deionized water to form solution B. Additionally, 2 g of Na<sub>2</sub>CO<sub>3</sub> were dissolved in 50 mL of deionized water to form solution C. Under continuous stirring, solutions A and B were added dropwise into solution C while maintaining the pH at 10 throughout the process. The resulting turbid suspension was centrifuged, washed three times with deionized water, and freeze-dried under vacuum for 12 hours.

##### Synthesis of CrO<sub>4</sub><sup>2-</sup>-NiFeCr-LDH:

We prepared CrO<sub>4</sub><sup>2-</sup>-NiFeCr-LDH with varying molar ratios of Ni:Fe:Cr, including 6:2:1, 6:2:0. Taking the preparation of CrO<sub>4</sub><sup>2-</sup>-NiFeCr(6:2:1)-LDH as an example, 3 mmol of Ni(NO<sub>3</sub>)<sub>2</sub>·6H<sub>2</sub>O, 1 mmol of Fe(NO<sub>3</sub>)<sub>3</sub>·9H<sub>2</sub>O, and 0.5 mmol of Cr(NO<sub>3</sub>)<sub>3</sub>·9H<sub>2</sub>O were dissolved in 20 mL of deionized water to form solution A. Separately, 1 g of NaOH and 1 g of K<sub>2</sub>CrO<sub>4</sub> were dissolved in 40 mL of deionized water to form solution B. Additionally, 2 g of K<sub>2</sub>CrO<sub>4</sub> were dissolved in 50 mL of deionized water to form solution C. Under continuous stirring, solutions A and B were added dropwise into solution C while maintaining the pH at 10 throughout the process. The resulting turbid suspension was centrifuged, washed three times with deionized water, and freeze-dried under vacuum for 12 hours.

##### Physical characterization

The SEM images were obtained using Zeiss SUPRA55, and the corresponding EDS mapping data were characterized using an energy-dispersive spectrometer (Oxford). The XRD patterns were recorded on a Bruker D8A25 diffractometer, and the XPS spectra were acquired using a Shimadzu Axis Supra instrument. FT-IR spectra were measured on a Thermo Fisher Nicolet 6700

spectrometer, and ICP data were obtained using a Thermo Fisher ICAP-6300 instrument. Raman spectra were collected using LabRAM Aramis spectrometer.

#### **Electrochemical measurement**

The OER performance of the samples was evaluated using a three-electrode system. A platinum plate ( $1 \times 1 \text{ cm}^2$ ) served as the counter electrode, and a Hg/HgO electrode was used as the reference electrode. The working electrode was prepared as follows: 5 mg of the sample was dispersed in 990  $\mu\text{L}$  of ethanol, and 10  $\mu\text{L}$  of 5% Nafion solution was added as a binder to form an ink. The ink was evenly drop-cast onto a nickel foam substrate and dried to obtain the working electrode. The three-electrode tests were conducted using an electrochemical workstation (DH7003 Donghua). For stability tests, a two-electrode system was employed, with the working electrode prepared using the same method as described above and a platinum plate ( $1 \times 1 \text{ cm}^2$ ) serving as the counter electrode. The chronopotentiometry tests were conducted on CT2001A LANHE.

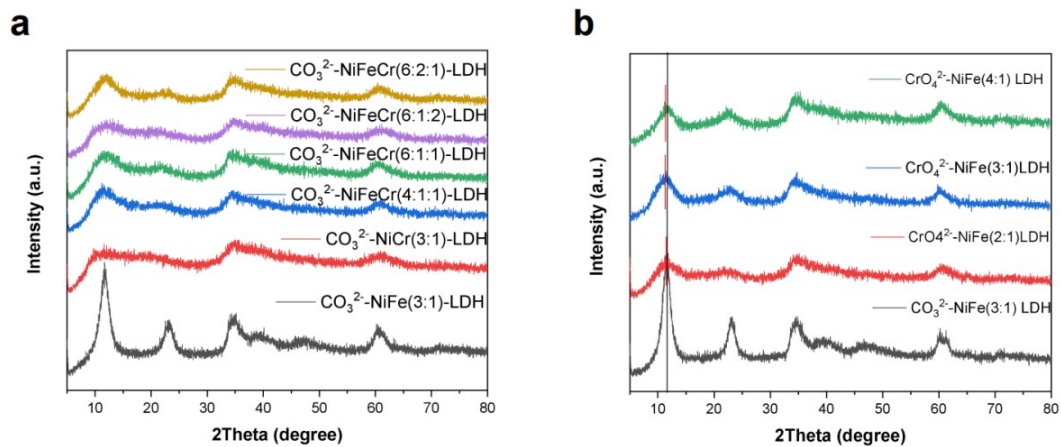

**Figure S1.** XRD patterns of (a)  $\text{CO}_3^{2-}$  intercalated NiFeCr-LDHs. (b)  $\text{CrO}_4^{2-}$  intercalated NiFe-LDH

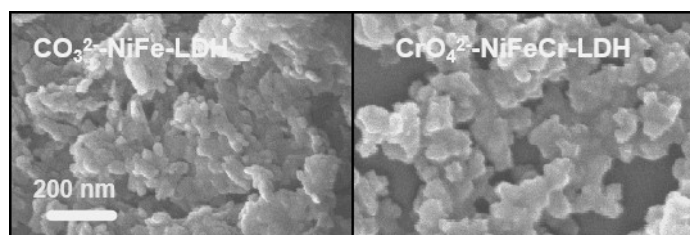

**Figure S2.** SEM images of  $\text{CO}_3^{2-}\text{-NiFe-LDH}$ s and  $\text{CrO}_4^{2-}\text{-NiFeCr-LDH}$ s.

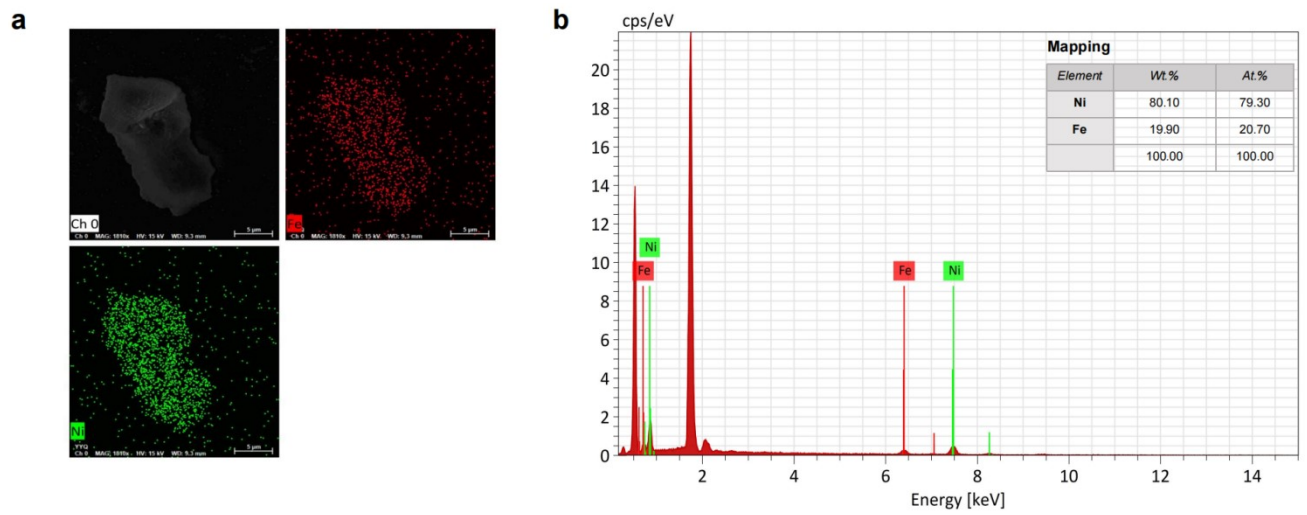

**Figure S3.** (a) EDS-mapping images of  $\text{CO}_3^{2-}$ -NiFe-LDH. (b) EDS spectra of  $\text{CO}_3^{2-}$ -NiFe-LDH and ratio of elements.

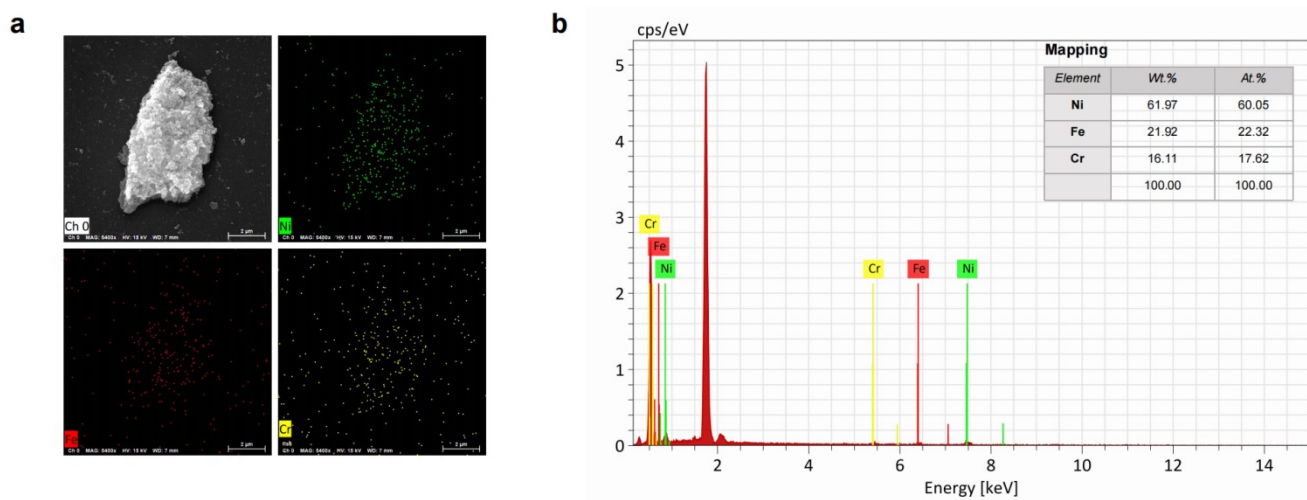

**Figure S4.** (a) EDS-mapping images of  $\text{CrO}_4^{2-}$ -NiFeCr-LDH. (b) EDS spectra of  $\text{CrO}_4^{2-}$ -NiFeCr-LDH and ratio of elements.

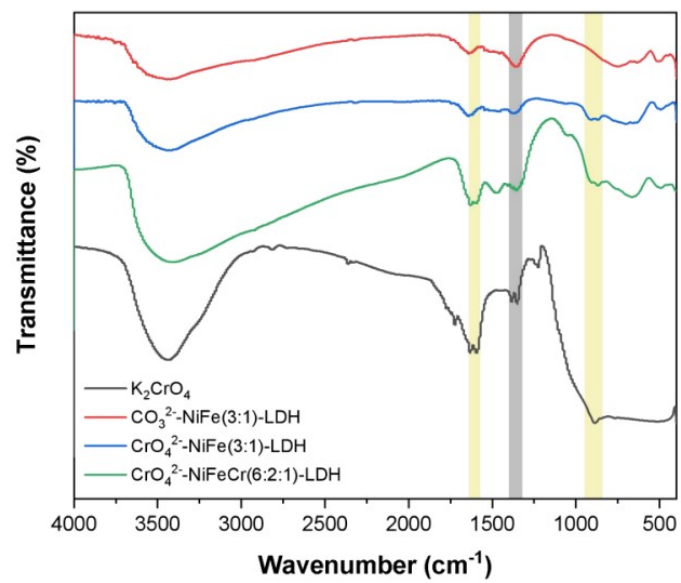

**Figure S5.** infrared spectra of  $\text{K}_2\text{CrO}_4$  and LDHs.

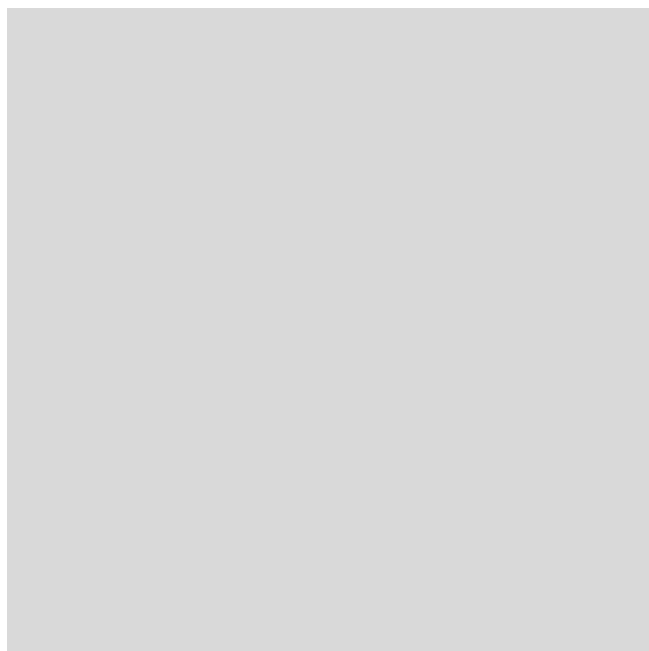

**Figure S6.** XPS spectra of Cr 2P of LDHs.



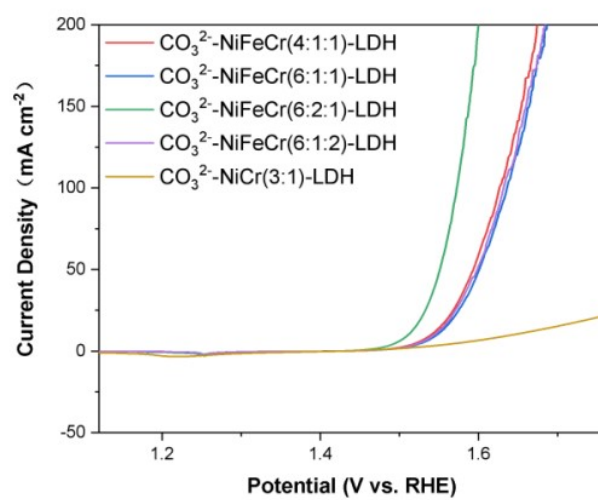

**Figure S7.** LSV curve of different Ni Fe Cr ratio LDH intercalated with CO<sub>3</sub><sup>2-</sup>.

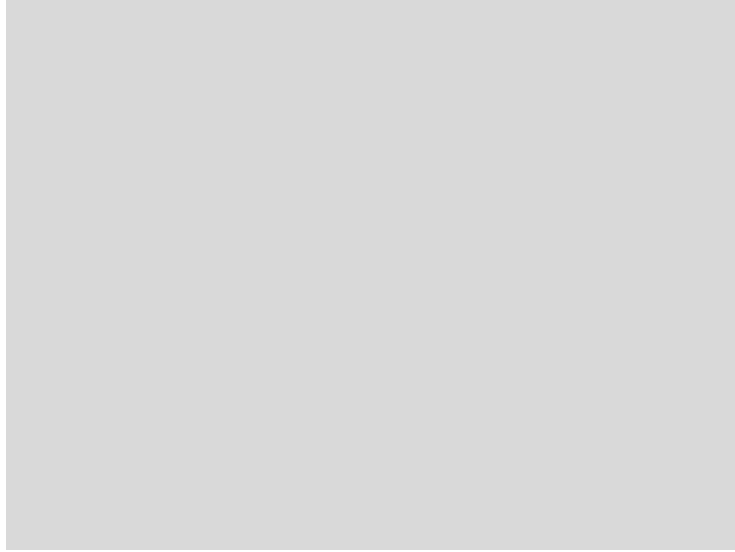

**Figure S8.** LSV curve of different Ni Fe ratio LDH intercalated with  $\text{CrO}_4^{2-}$ .

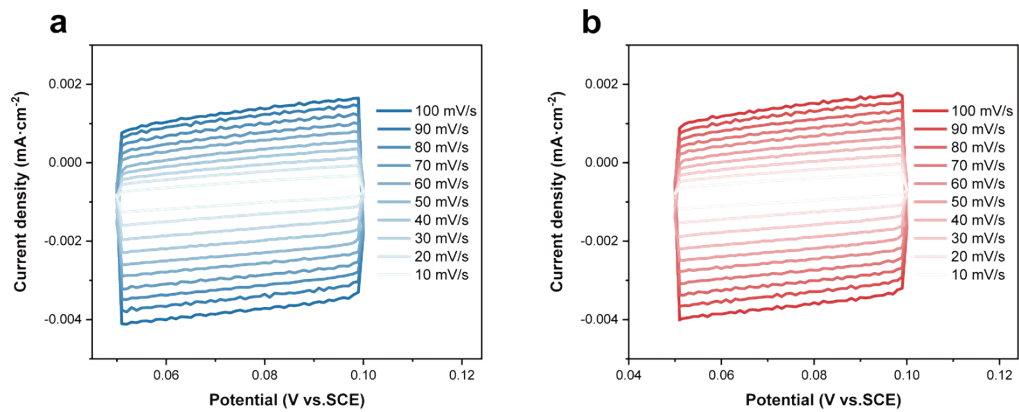

**Figure S9.** ECSA measurements of (a) CO<sub>3</sub><sup>2-</sup>-NiFe-LDH, (b) CrO<sub>4</sub><sup>2-</sup>-NiFeCr-LDH.

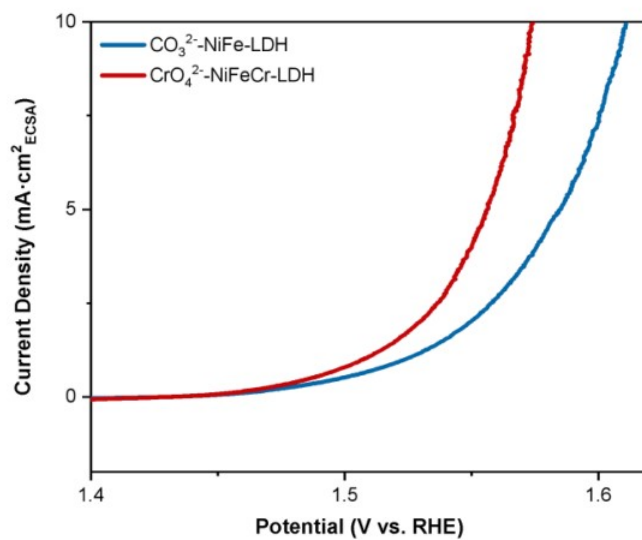

**Figure S10.** ECSA normalized LSV curve.

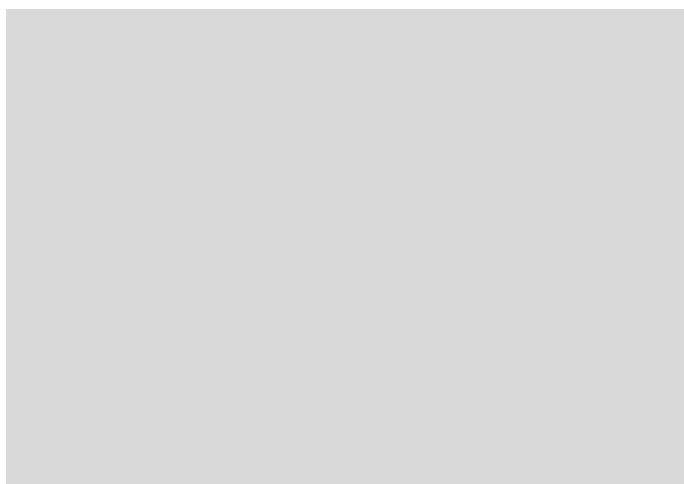

**Figure S11.** Nyquist plots tested at 0.4 V vs. reference electrode.

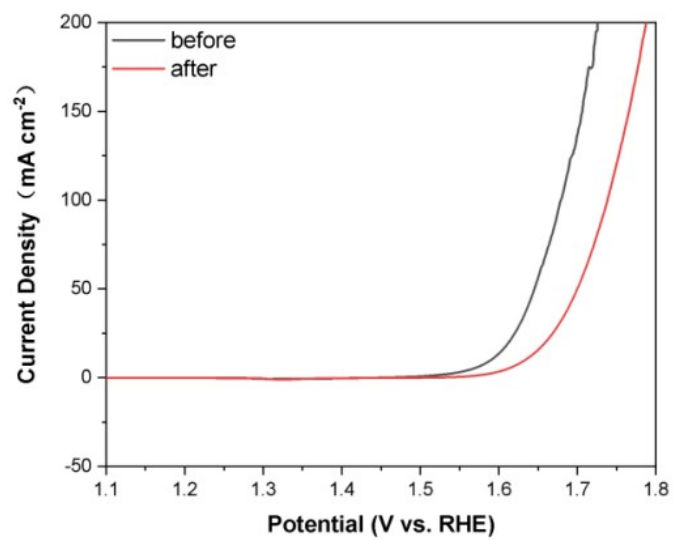

**Figure S12.** LSV curves of CO<sub>3</sub><sup>2-</sup>-NiFeCr-LDH before and after stability test.

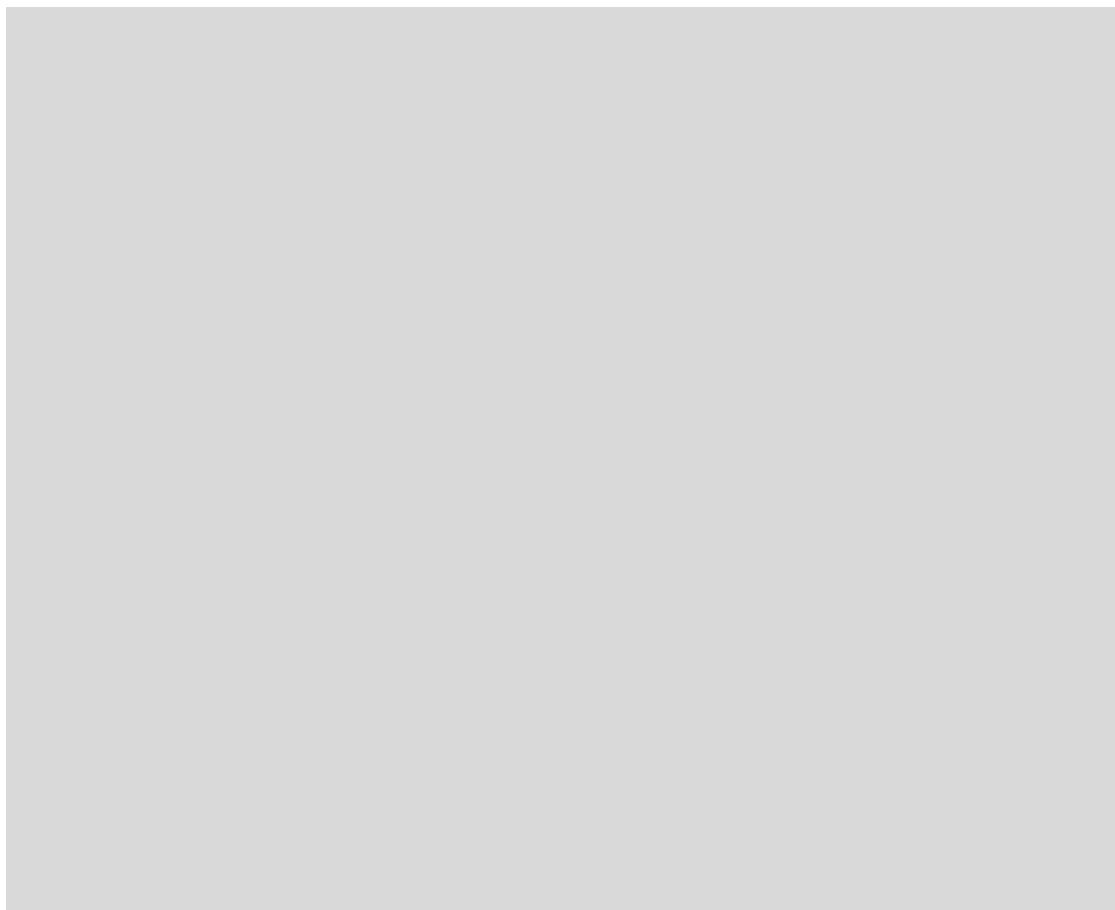

**Figure S13.** (a) LSV curves of  $\text{CrO}_4^{2-}$ -NiFeCr-LDH after stability test for different  $\text{CrO}_4^{2-}$  concentrations. (b) LSV curves of  $\text{CrO}_4^{2-}$ -NiFeCr-LDH before and after stability test in 0.5 mM  $\text{CrO}_4^{2-}$ . (c) LSV curves of  $\text{CrO}_4^{2-}$ -NiFeCr-LDH before and after stability test in 1 mM  $\text{CrO}_4^{2-}$ . (d) LSV curves of  $\text{CrO}_4^{2-}$ -NiFeCr-LDH before and after stability test in 2 mM  $\text{CrO}_4^{2-}$ .

**Figure S14.** SEM images of  $\text{CrO}_4^{2-}$ -NiFeCr-LDH after stability test.



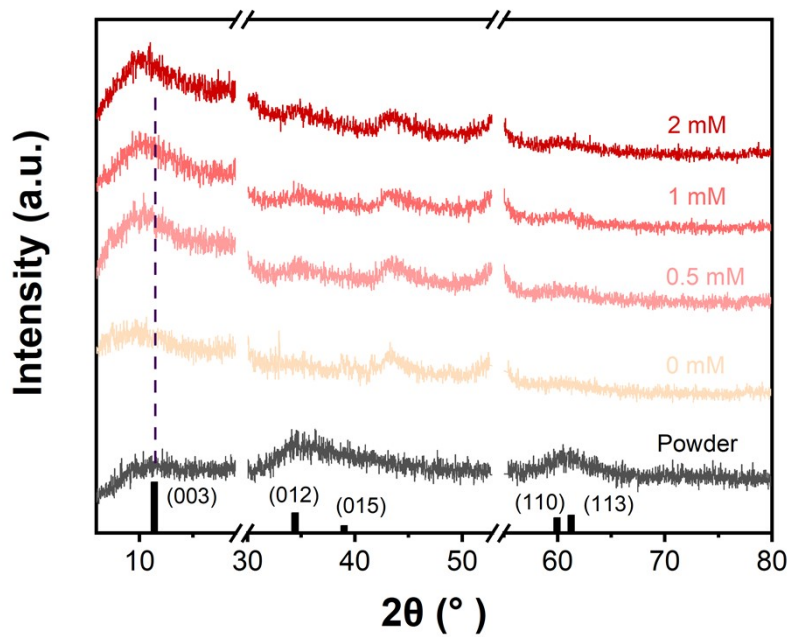

**Figure S15.** XRD patterns of CrO<sub>4</sub><sup>2-</sup>-NiFeCr-LDH after stability test.

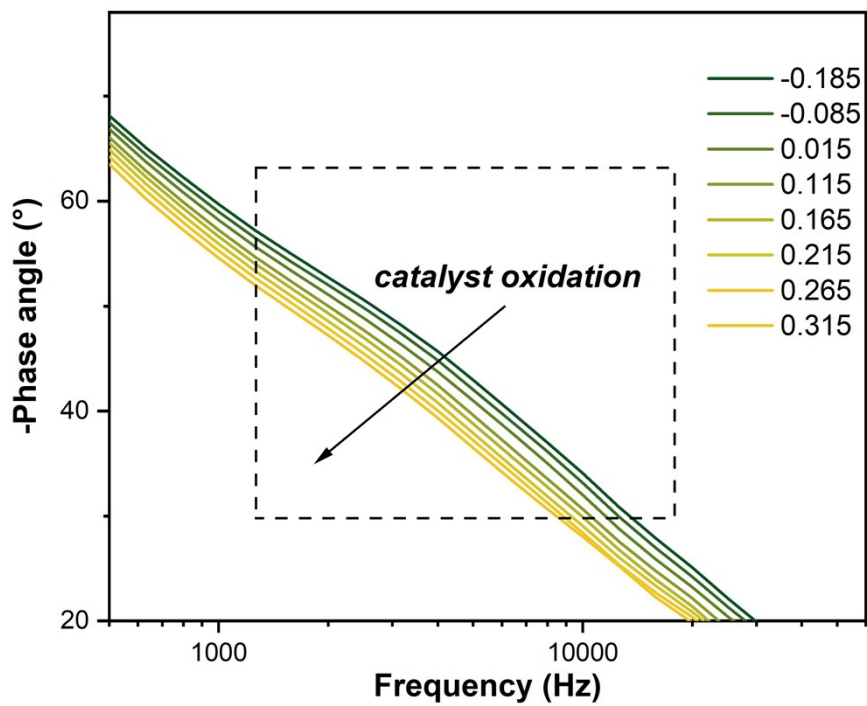

**Figure S16.** magnified operando bode plots of CrO<sub>4</sub><sup>2-</sup>-NiFeCr-LDH.

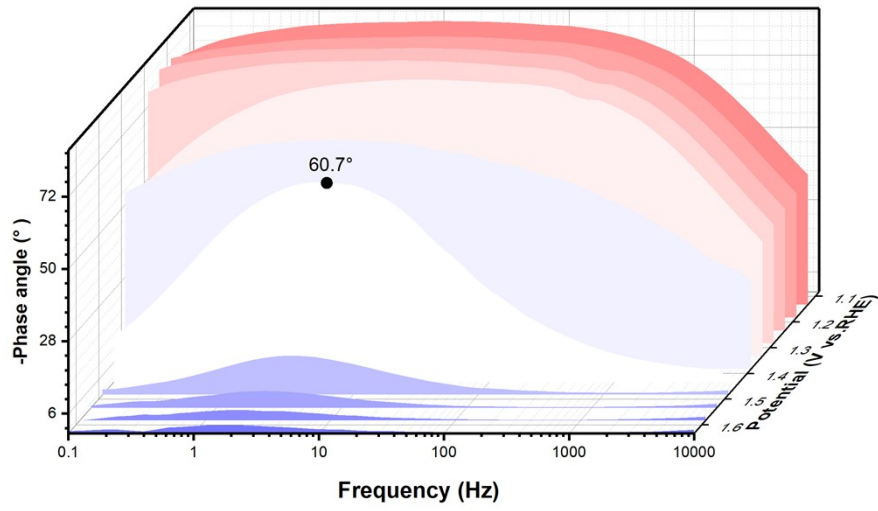

**Figure S17.** Operando bode plots of CrO<sub>4</sub><sup>2-</sup>-NiFeCr-LDHs in 2 mM CrO<sub>4</sub><sup>2-</sup>.

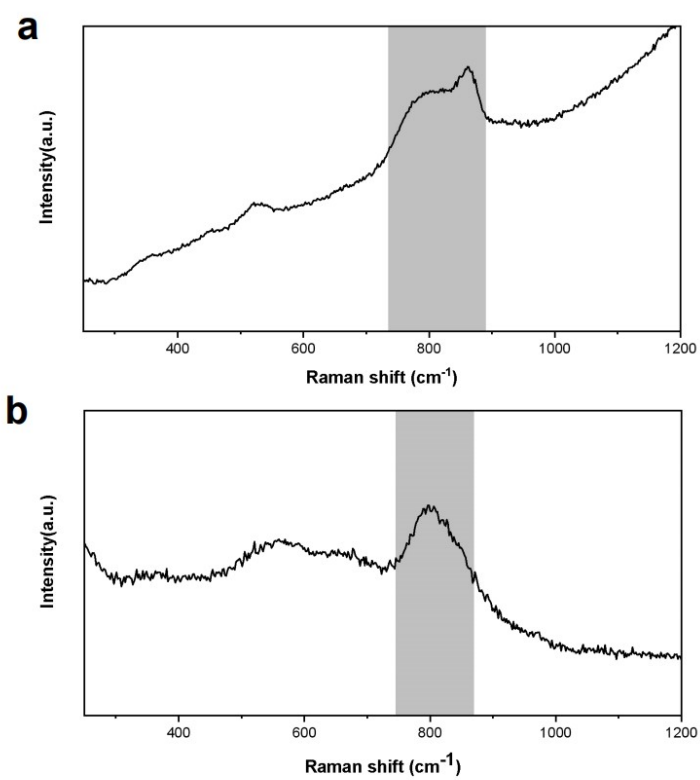

**Figure S18.** raman spectra of (a) CrO<sub>4</sub><sup>2-</sup>-NiFe-LDH, (b) CO<sub>3</sub><sup>2-</sup>-NiFeCr-LDH.

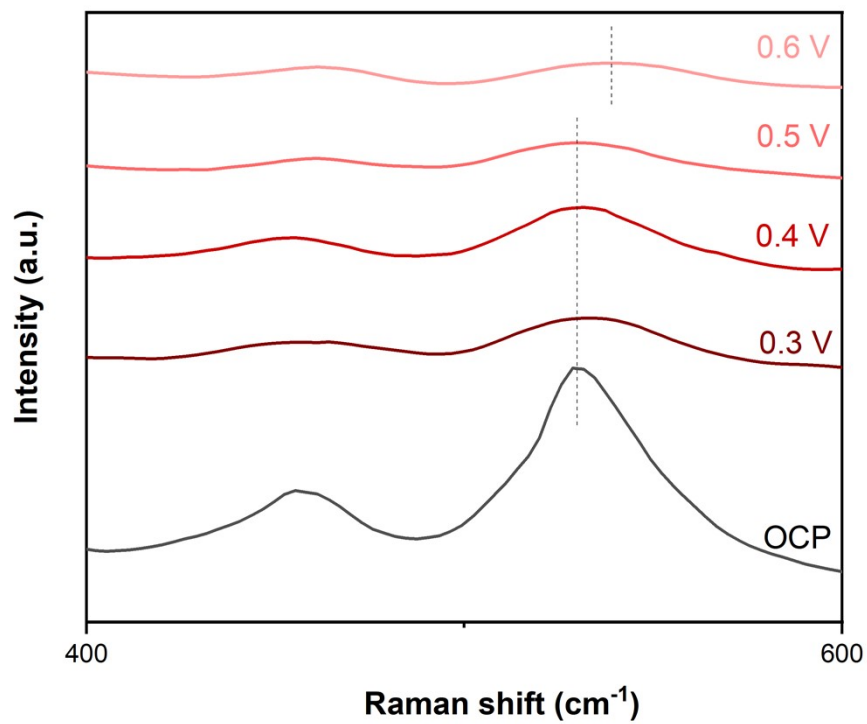

**Figure S19.** magnified in-situ raman spectra of CrO<sub>4</sub><sup>2-</sup>-NiFeCr-LDH.

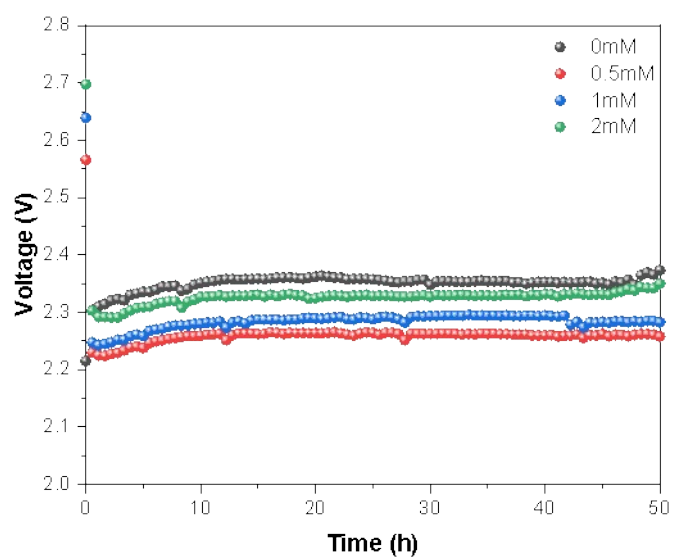

**Figure S20.** 50h OER stability test of CrO<sub>4</sub><sup>2-</sup>-NiFeCr-LDH in chromate electrolyte with different concentrations at a current density of 400 mA·cm<sup>-2</sup> at 80°C.

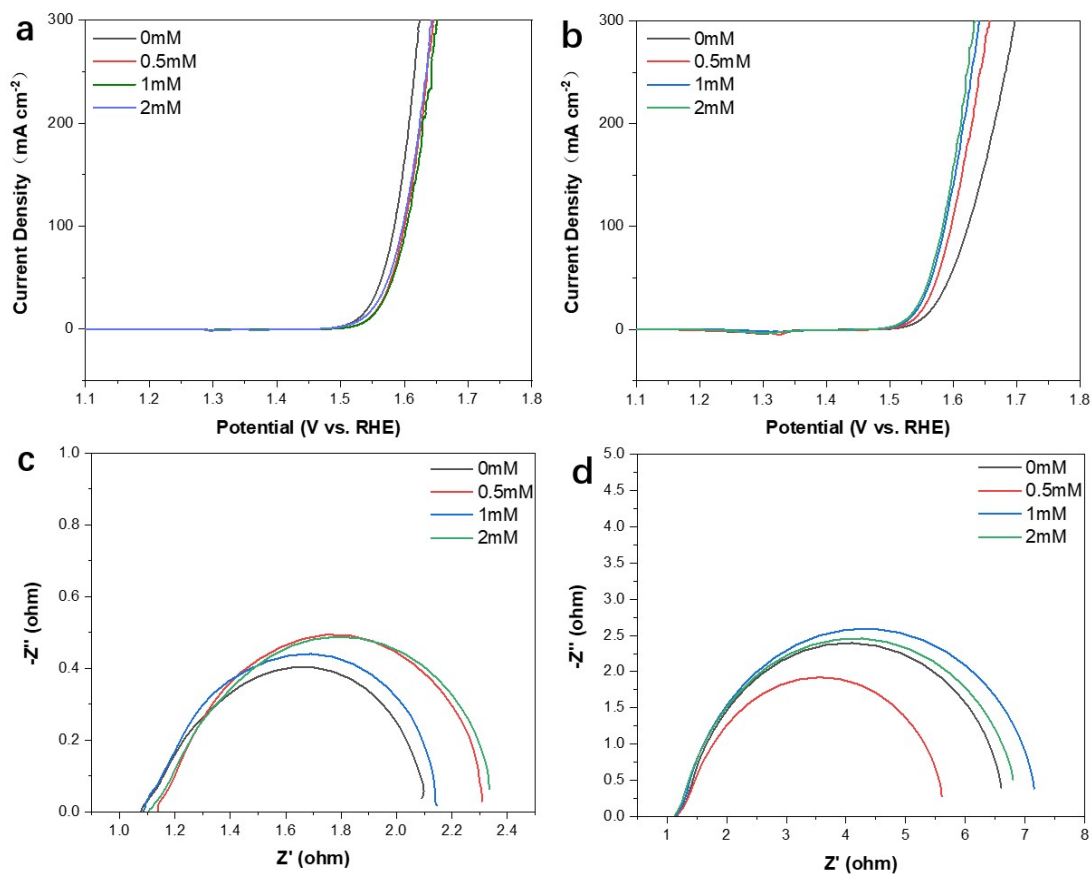

**Figure S21.** CrO<sub>4</sub><sup>2-</sup>-NiFeCr-LDH in different concentrations of CrO<sub>4</sub><sup>2-</sup> electrolyte at 80 °C (a) polarization curves before stability test; (b) Polarization curves after stability test; (c) EIS spectrum before stability test; (d) EIS spectrum after stability test.

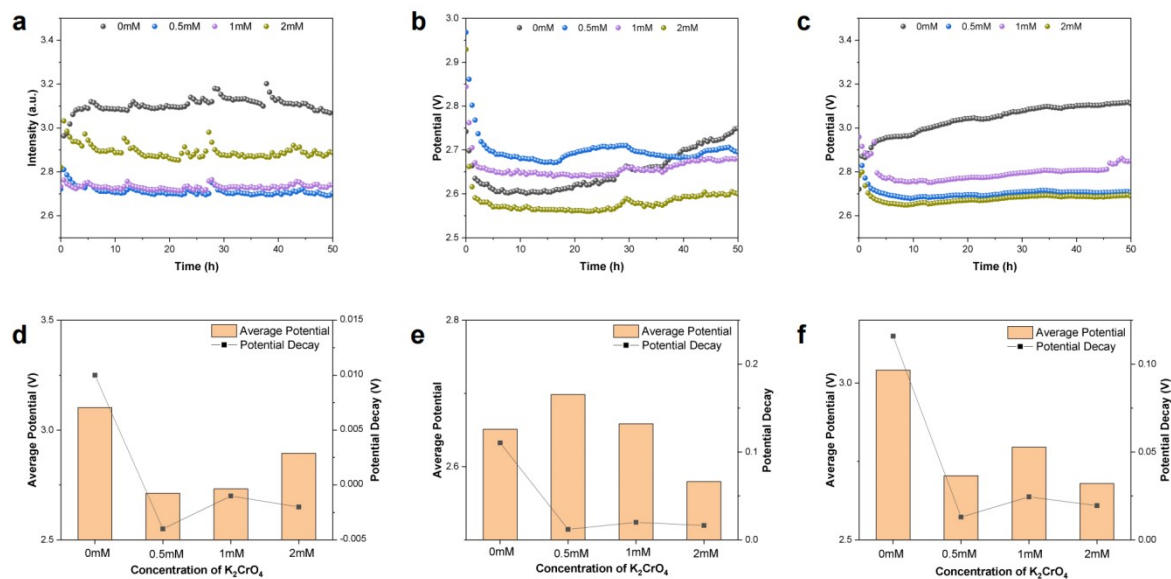

**Figure S22.** Chronopotentiometric curves of different electrocatalyst samples for stability test (a)  $CO_3^{2-}$ -NiFeCr-LDH; (b)  $CrO_4^{2-}$ -NiFe-LDH; (c)  $CO_3^{2-}$ -NiFe-LDH; Average voltage and voltage variation of samples of different electrocatalysts (d)  $CO_3^{2-}$ -NiFeCr-LDH; (e)  $CrO_4^{2-}$ -NiFe-LDH; (f)  $CO_3^{2-}$ -NiFe-LDH.



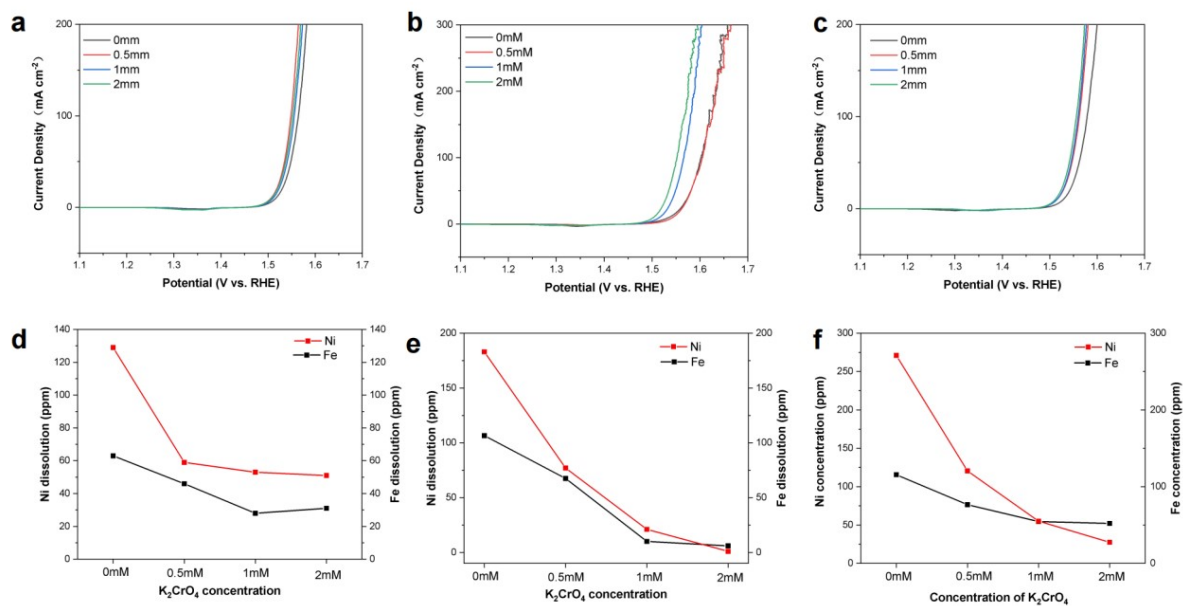

**Figure S23.** LSV curves after stability test of different electrocatalyst samples (a)  $\text{CO}_3^{2-}$ -NiFeCr-LDH, (b)  $\text{CrO}_4^{2-}$ -NiFe-LDH, (c)  $\text{CO}_3^{2-}$ -NiFe-LDH, dissolution amount of Ni and Fe in electrolyte, (d)  $\text{CO}_3^{2-}$ -NiFeCr-LDH, (e)  $\text{CrO}_4^{2-}$ -NiFe-LDH, (f)  $\text{CO}_3^{2-}$ -NiFe-LDH.

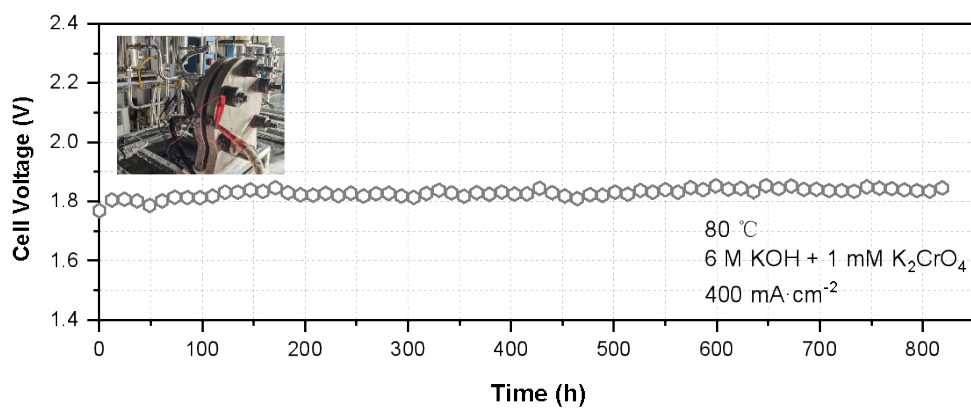

**Figure S24.** Chronopotentiometric curves of CrO<sub>4</sub><sup>2-</sup>-NiFe-LDH based AWE at 400 mA·cm<sup>-2</sup>.
